# Supplementary material for: Enzymatic and Synthetic Routes of Castor Oil Epoxidation
Source: MDPI journal article supplement (doi:10.3390/polym15112477), 2023-05-27
Supplement: s1 [file s1]

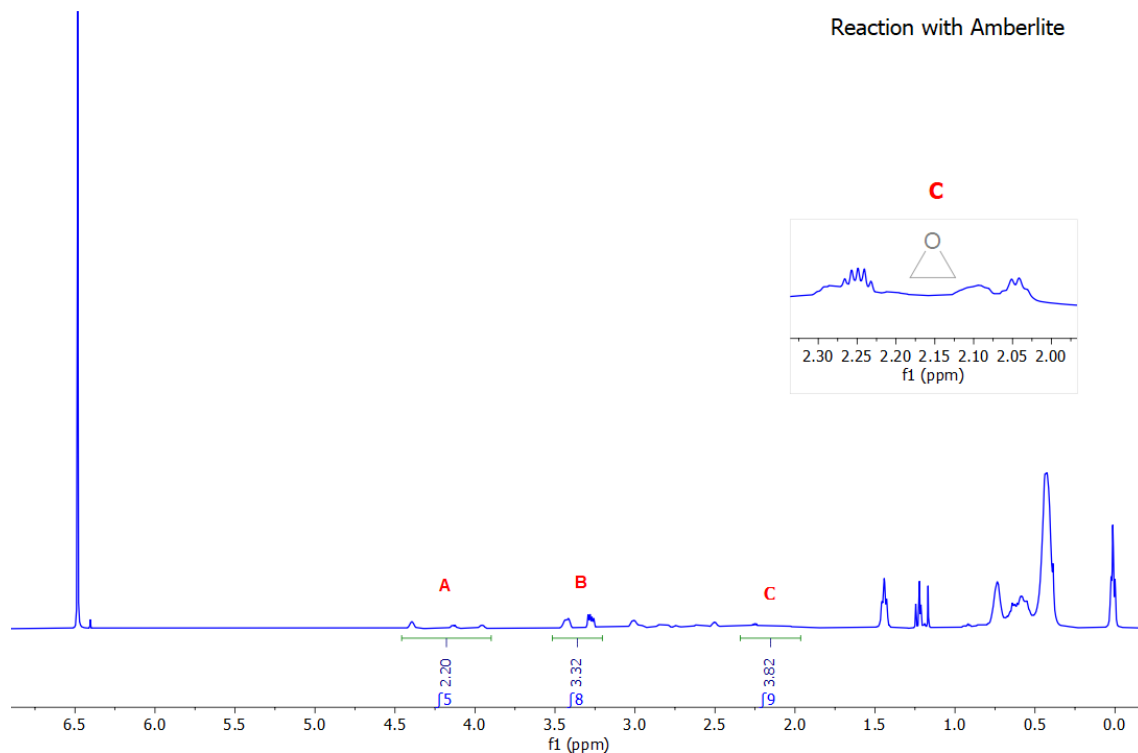

**Figure S1:**  $^1\text{H}$ -NMR of the synthetic epoxidation reaction with Amberlite.

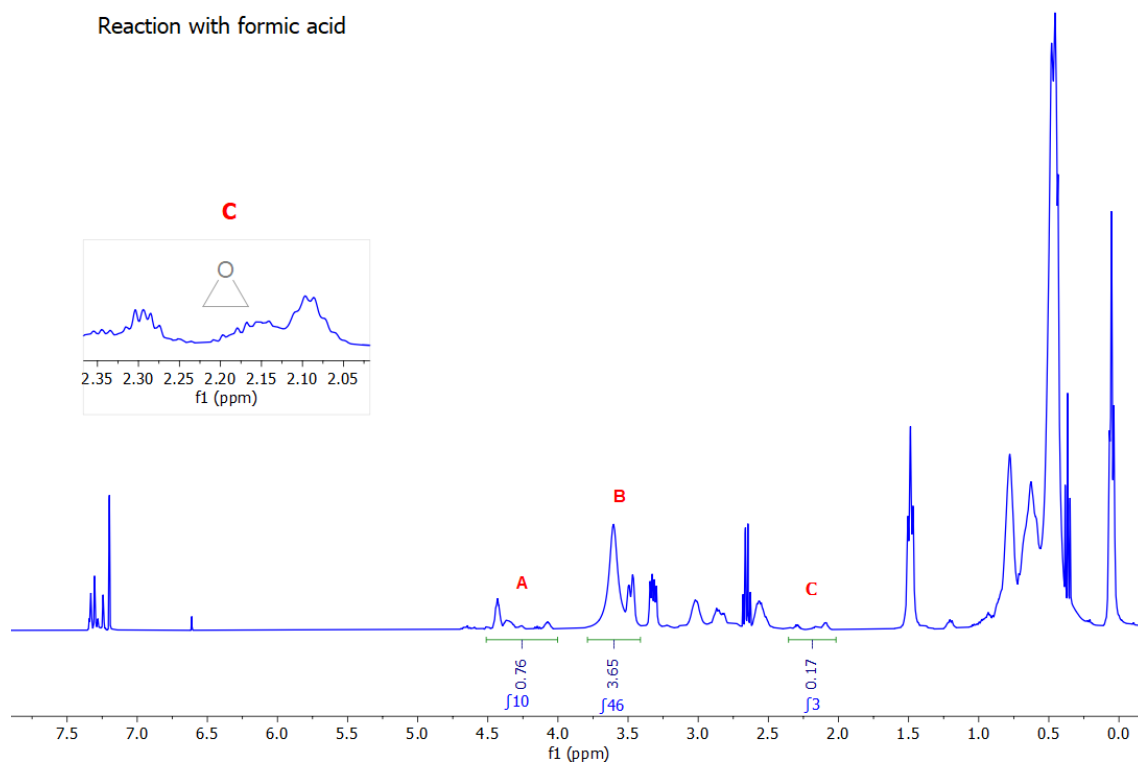

**Figure S2:**  $^1\text{H}$ -NMR of the synthetic epoxidation reaction with formic acid.

EE with AI - 24hrs

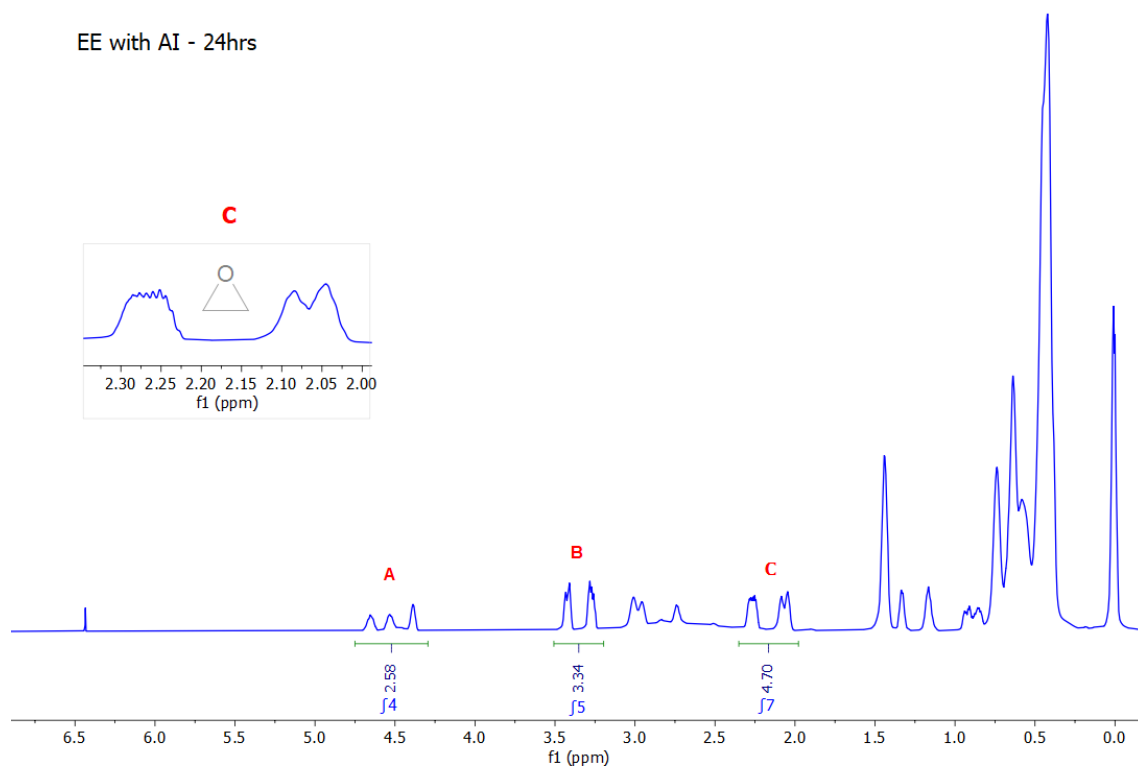

**Figure S3:**  $^1\text{H}$ -NMR from the 24 hr enzymatic epoxidation reaction with AI.

EE without AI - 24hrs

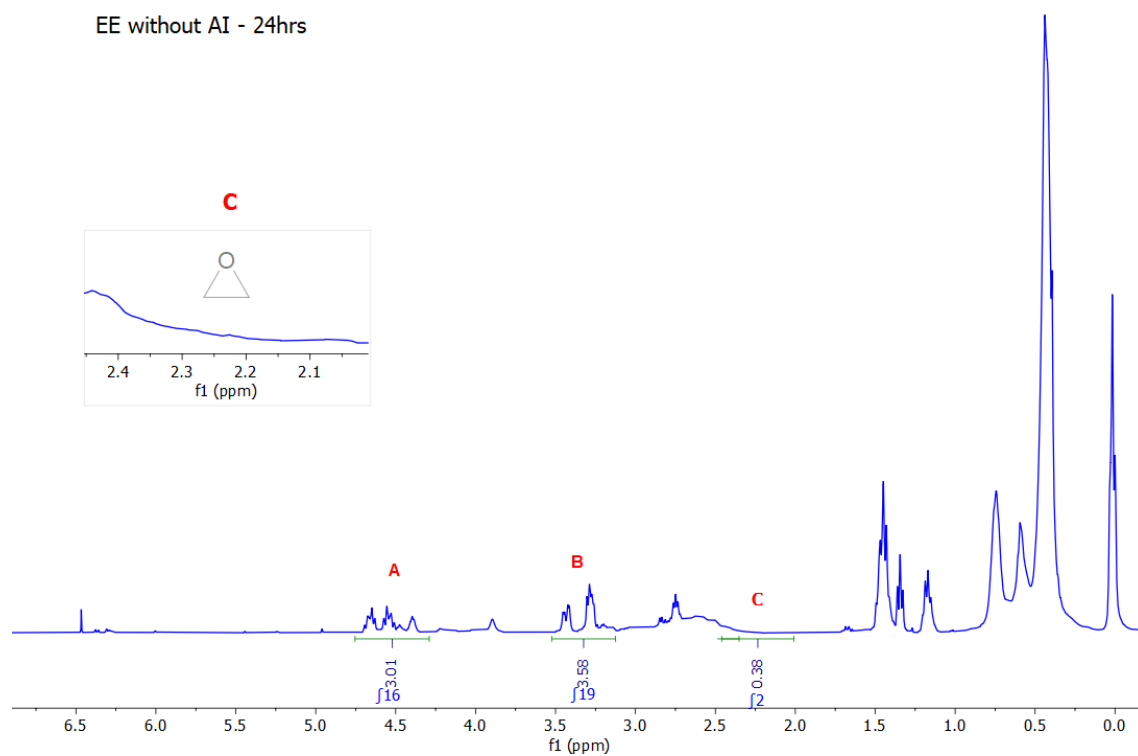

**Figure S4:**  $^1\text{H}$ -NMR from the 24 hr enzymatic epoxidation reaction without AI.

EE without AI - 6hrs with toluene

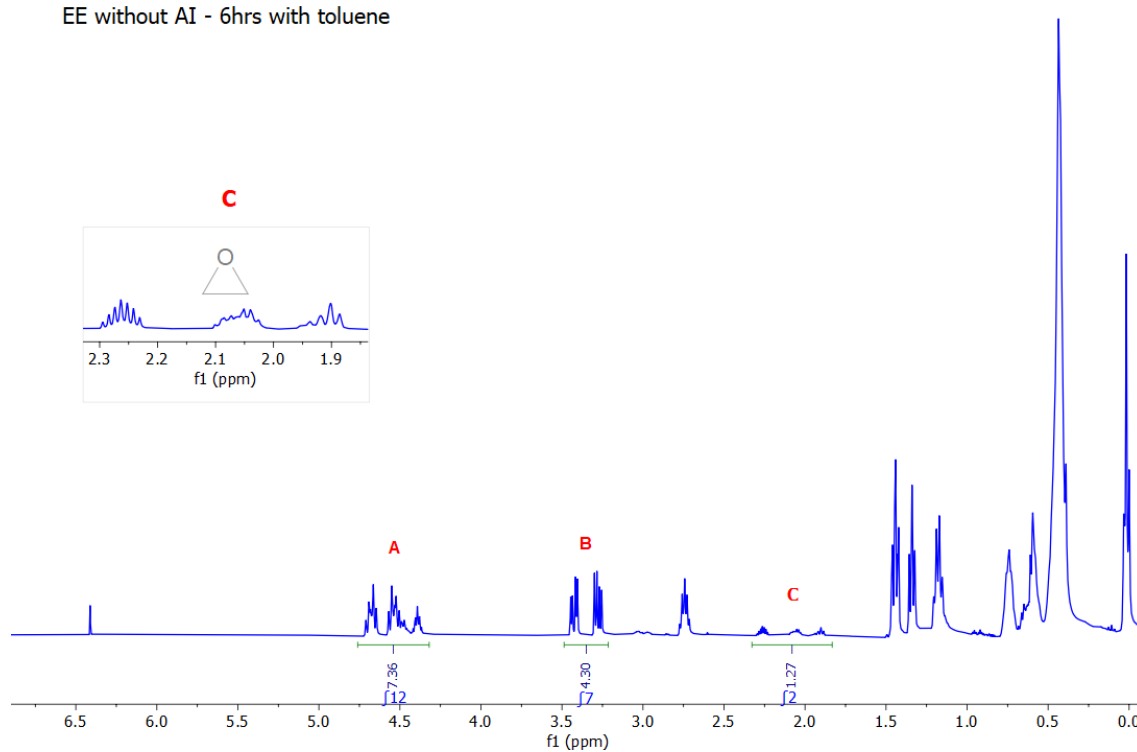

**Figure S5:**  $^1\text{H}$ -NMR from the 6 hr enzymatic epoxidation reaction without AI with toluene.

EE without IA - 6hrs without toluene

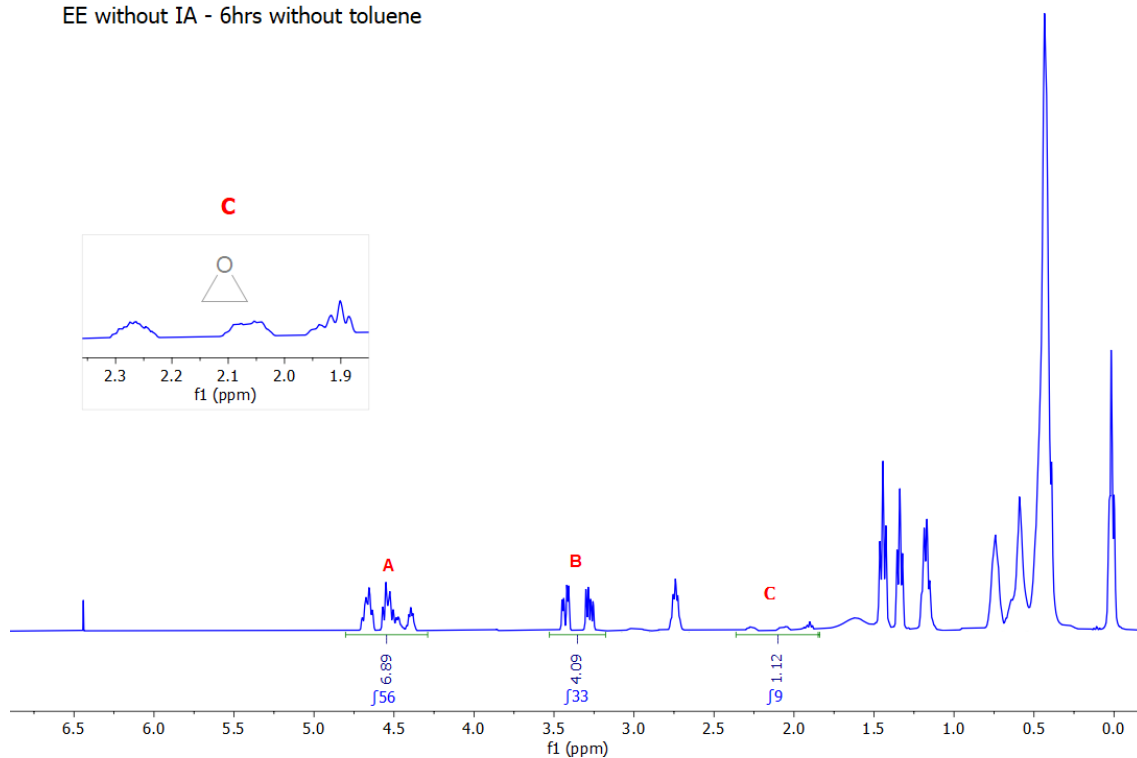

**Figure S6:**  $^1\text{H}$ -NMR from the 6 hr enzymatic epoxidation reaction without AI without toluene.
